# Supplementary material for: In situ construction and composition engineering of PbBiO2Br/metal halide perovskite heterojunctions for enhanced interfacial charge transfer and photocatalytic activity
Source: Royal Society of Chemistry journal article supplement (doi:10.1039/d4ta08217f), 2024-12-27
Supplement: d4ta08217f1.pdf [file d4ta08217f1.pdf]

## Supplementary Information

### ***In situ construction and composition engineering of PbBiO<sub>2</sub>Br/metal halide perovskite heterojunctions for enhanced interfacial charge transfer and photocatalytic activity***

Qi Qin,<sup>a,b</sup> Wei-Qi Liu,<sup>a</sup> Zhi-Hua Xia,<sup>a</sup> Hong-Yan Chen,<sup>\*a</sup> and Dai-Bin Kuang<sup>\*a</sup>

<sup>a</sup>Key Laboratory of Bioinorganic and Synthetic Chemistry of Ministry of Education, LIFM, GBRCE for Functional Molecular Engineering, School of Chemistry, IGCME, Sun Yat-Sen University, Guangzhou 510006, China

<sup>b</sup>School of Chemical Engineering and Technology, Sun Yat-sen University, Zhuhai 519082, China

E-mail: chenhy33@mail.sysu.edu.cn (H. Y. Chen); kuangdb@mail.sysu.edu.cn (D. B. Kuang)

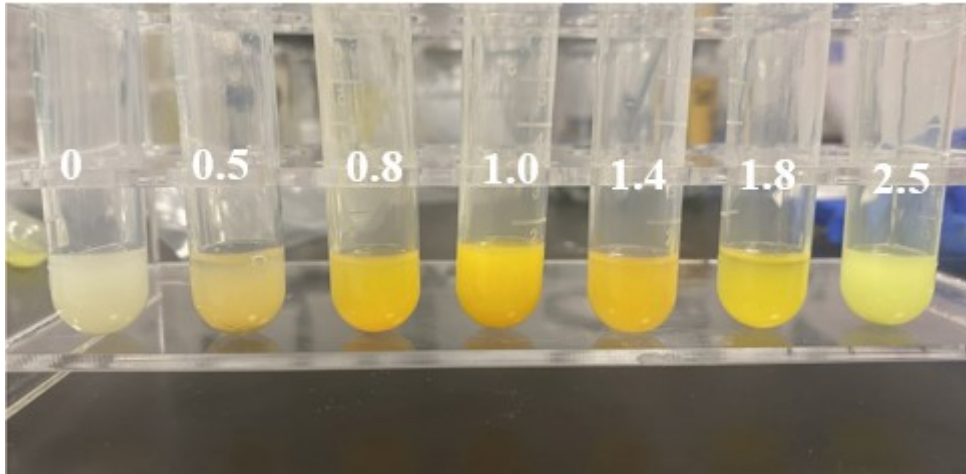

**Fig. S1.** Optical photos of heterojunctions prepared with different volumes of the HBr: 0, 0.5, 0.8, 1.0, 1.4, 1.8 and 2.5  $\mu\text{L}$  of the HBr was added from left to right, respectively.

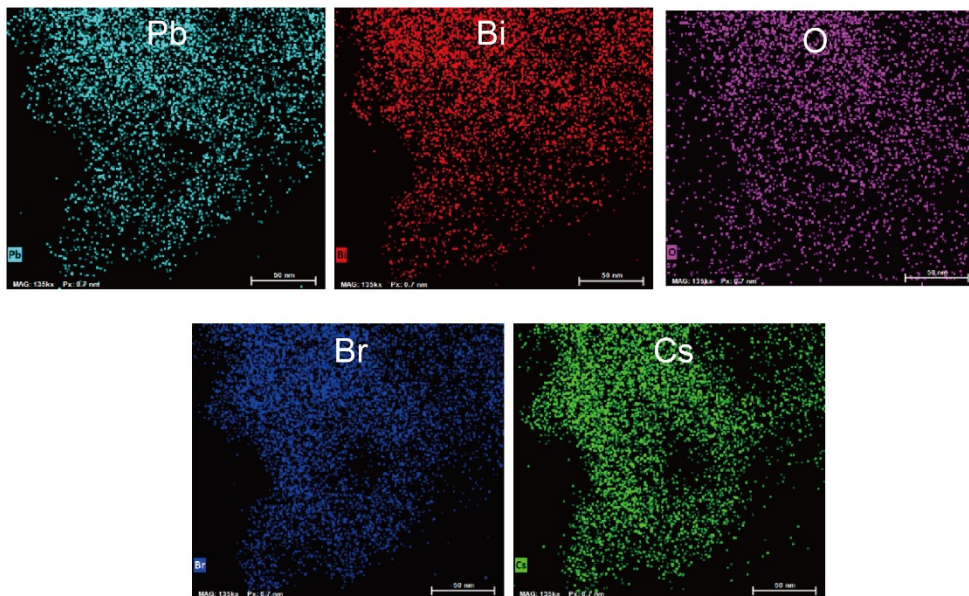

**Fig. S2.** Element mapping of PbBiO<sub>2</sub>Br/MHPs (1.0).

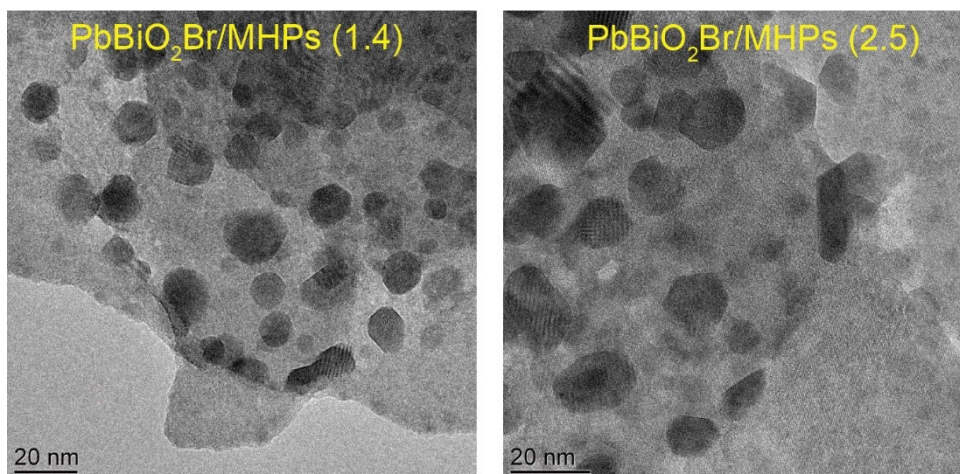

**Fig. S3.** Low-magnified TEM images of PbBiO<sub>2</sub>Br/MHPs(1.4) and PbBiO<sub>2</sub>Br/MHPs(2.5).

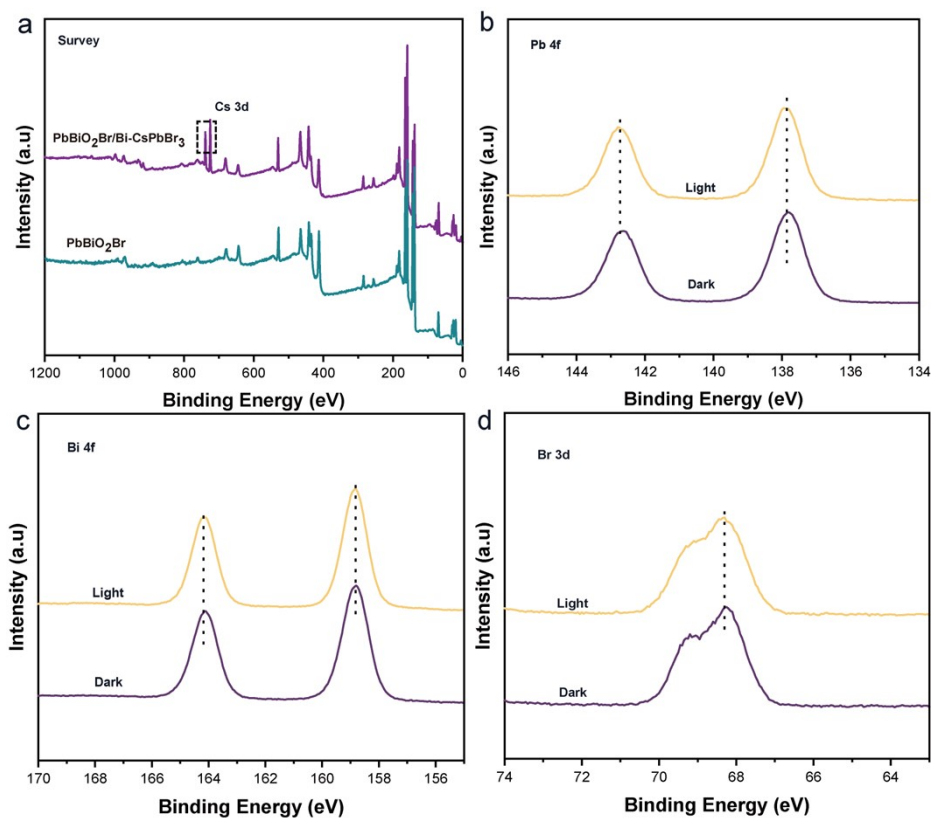

**Fig. S4.** *In situ* XPS spectra of PbBiO<sub>2</sub>Br and PbBiO<sub>2</sub>Br/Bi-CsPbBr<sub>3</sub>:(a) survey spectra; (b) Pb 4f; (c) Bi 4f; (d) Br 3d.

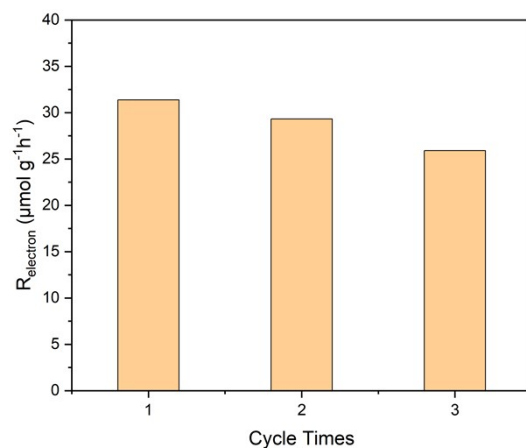

**Fig. S5.** Photocatalytic recycling tests of  $\text{PbBiO}_2\text{Br}/\text{Bi-CsPbBr}_3$  heterojunction with the reaction system refreshed every 3 h.

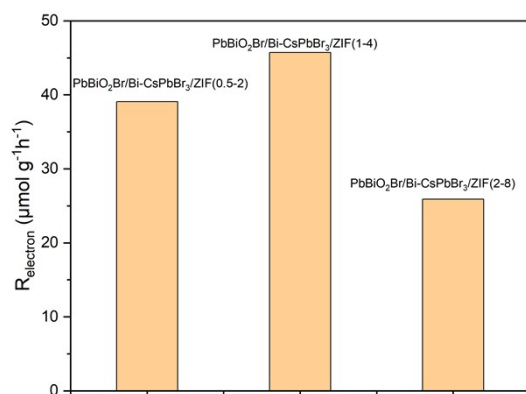

**Fig. S6.** Photocatalytic  $\text{CO}_2$  reduction performances of  $\text{PbBiO}_2\text{Br}/\text{Bi-CsPbBr}_3/\text{ZIF-67}$  heterojunction prepared by different ZIF-67 precursor concentration after irradiation for 3 h.

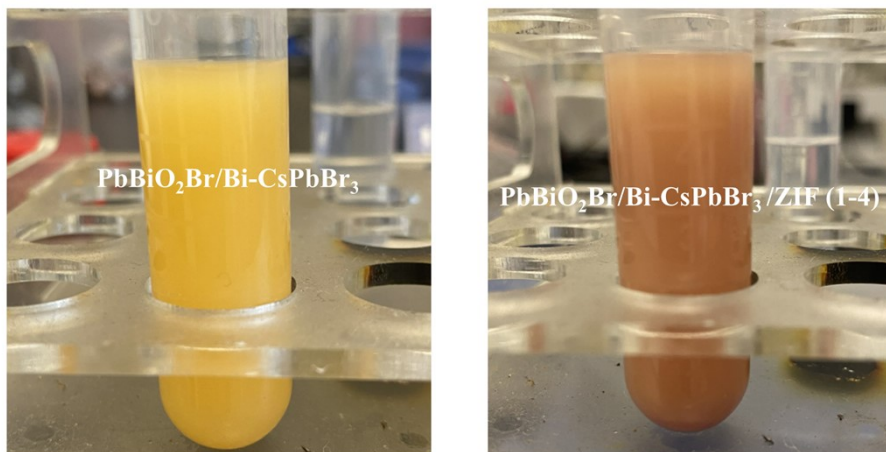

**Fig. S7.** Optical photos of  $\text{PbBiO}_2\text{Br/Bi-CsPbBr}_3$  and  $\text{PbBiO}_2\text{Br/Bi-CsPbBr}_3/\text{ZIF-67}$  sample.

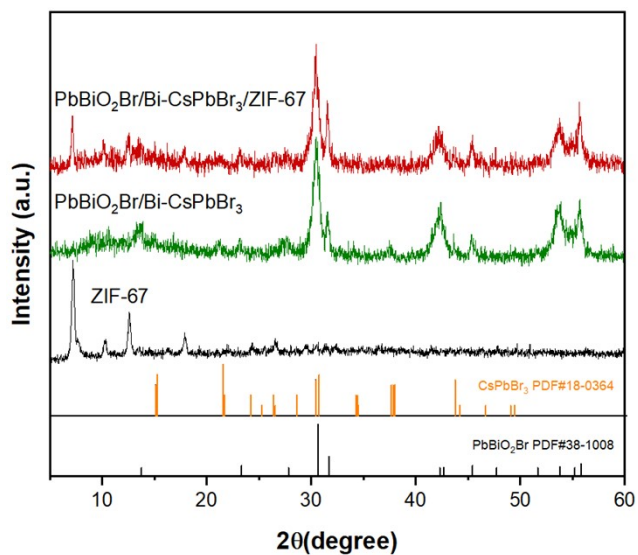

**Fig. S8.** XRD patterns of ZIF-67,  $\text{PbBiO}_2\text{Br/Bi-CsPbBr}_3$  and  $\text{PbBiO}_2\text{Br/Bi-CsPbBr}_3/\text{ZIF-67}$  samples.

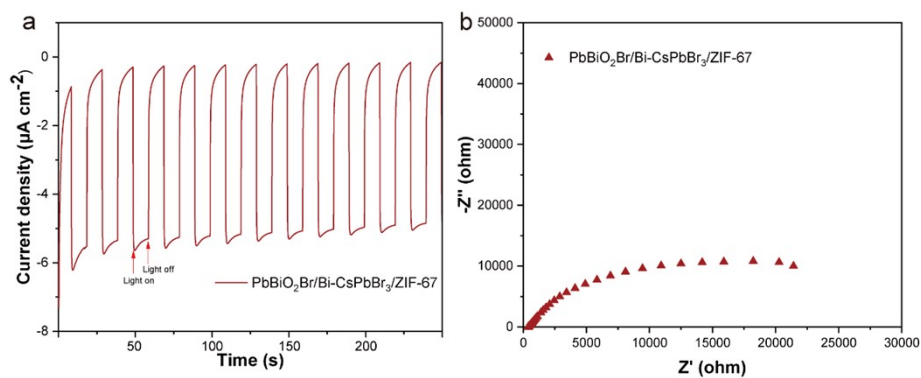

**Fig. S9.** (a)  $I-t$  curves and (b) Nyquist plots of  $\text{PbBiO}_2\text{Br/Bi-CsPbBr}_3/\text{ZIF-67}$  film.

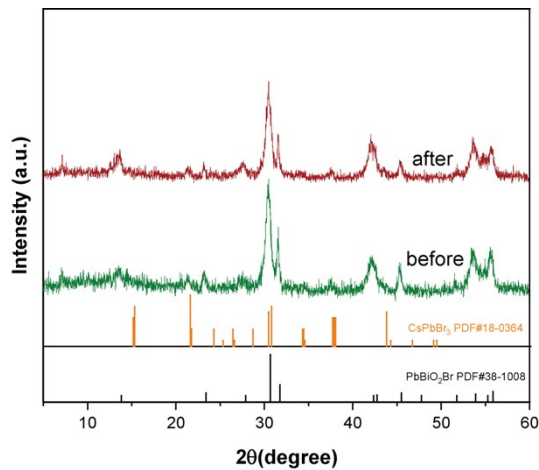

**Fig. S10.** The XRD patterns of  $\text{PbBiO}_2\text{Br/Bi-CsPbBr}_3/\text{ZIF-67}$  heterojunction before and after five consecutive cycles of photocatalytic  $\text{CO}_2$  reduction.
